# Supplementary material
Source: Research Square preprint supplement (doi:10.21203/rs.3.rs-9729647/v1)
Supplement: Supplementary file 1 [file 77acd6207158ebcc635e795f.xlsx]

## Sheet: Table S1
Table S1. Voucher Information of Studied Pteridophyte Species
Family	Genus	Species	Specimen collector name	Voucher No	Locality	Date	Locality	Latitude (N)	Longitude (E)
Aspleniaceae	Asplenium L.	Asplenium adiantum-nigrum	Mohammad Sohail	Awkum899	Dir Loower Monrh	2021-01-12	Monrh	34.731°	71.880°
Aspleniaceae	Asplenium L.	Asplenium septentrionale	Mohammad Sohail	Awkum909	Muslim Khwarh	2021-03-25	Muslim Khwarh	34.702°	71.845°
Aspleniaceae	Asplenium L.	Asplenium dalhousieae	Mohammad Sohail	Awkum917	Abdullah Banda	2021-07-07	Abdullah Banda	34.745°	71.865°
Aspleniaceae	Asplenium L.	Asplenium incisum	Mohammad Sohail	Awkum925	Borany	2021-10-18	Borany	34.760°	71.900°
Athyriaceae	Athyrium Hook.	Athyrium drepanopteron	Mohammad Sohail	Awkum938	Monrh	2022-02-03	Monrh	34.731°	71.880°
Dryopteridaceae	Dryopteris Adans.	Dryopteris serrato-dentata	Mohammad Sohail	Awkum943	Monrh	2022-04-29	Monrh	34.731°	71.880°
Dryopteridaceae	Dryopteris Adans.	Dryopteris splendens	Mohammad Sohail	Awkum952	Monrh	2022-08-14	Monrh	34.731°	71.880°
Dryopteridaceae	Gymnocarpium L.	Gymnocarpium dryopteris	Mohammad Sohail	Awkum961	Chinarkot	2022-12-21	Chinarkot	34.715°	71.920°
Dryopteridaceae	Polystichum L.	Polystichum discretum	Mohammad Sohail	Awkum976	Monrh	2023-01-05	Monrh	34.731°	71.880°
Dryopteridaceae	Polystichum L.	Polystichum lonchitis	Mohammad Sohail	Awkum987	Chinarkot	2023-03-17	Chinarkot	34.715°	71.920°
Equisetaceae	Equisetum L.	Equisetum arvense	Mohammad Sohail	Awkum998	Konye Khwarh	2023-06-09	Konye Khwarh	34.690°	71.860°
Equisetaceae	Equisetum L.	Equisetum ramosissimum	Mohammad Sohail	Awkum1001	Chinarkot	2023-09-28	Chinarkot	34.715°	71.920°
Marsileaceae	Marsilea L.	Marsilea quadrifolia	Mohammad Sohail	Awkum1013	Konye Khwarh	2024-02-11	Konye Khwarh	34.690°	71.860°
Pteridaceae	Adiantum L.	Adiantum capillus-veneris	Mohammad Sohail	Awkum1025	Shahe Kot	2024-05-24	Shahe Kot	34.770°	71.950°
Pteridaceae	Adiantum L.	Adiantum incisum	Mohammad Sohail	Awkum1036	Chinarkot	2024-07-08	Chinarkot	34.715°	71.920°
Pteridaceae	Adiantum L.	Adiantum venustum	Mohammad Sohail	Awkum1047	Kotkay	2024-10-30	Kotkay	34.720°	71.875°
Pteridaceae	Anogramma Link	Anogramma leptophylla	Mohammad Sohail	Awkum1054	Tarano	2025-01-15	Tarano	34.705°	71.835°
Pteridaceae	Hemionitis Sw.	Hemionitis acrostica	Mohammad Sohail	Awkum1063	Fazalabad	2025-03-27	Fazalabad	34.740°	71.890°
Pteridaceae	Pteris L.	Taenitis blechnoides	Mohammad Sohail	Awkum1072	Chinarkot	2025-06-06	Chinarkot	34.715°	71.920°
Pteridaceae	Pteris L.	Pteris cretica	Mohammad Sohail	Awkum1081	Chinarkot	2025-08-19	Chinarkot	34.715°	71.920°
Pteridaceae	Pteris L.	Pteris dactylina	Mohammad Sohail	Awkum1096	Chinarkot	2025-10-02	Chinarkot	34.715°	71.920°
Pteridaceae	Pteris L.	Pteris vittata	Mohammad Sohail	Awkum1106	Chinarkot	2025-11-14	Chinarkot	34.715°	71.920°
Selaginellaceae	Selaginella P. Beauv.	Selaginella jacquemontii	Mohammad Sohail	Awkum1115	Monrh	2025-12-22	Monrh	34.731°	71.880°
Selaginellaceae	Selaginella P. Beauv.	Selaginella sanguinolenta	Mohammad Sohail	Awkum1123	Monrh	2025-11-14	Monrh	34.731°	71.880°

## Sheet: Table S2
Table S2. Qaualatitive Characters of Studied Pteridophyte Species
Species	Frond length (cm)	Frond width (cm)	(L/W) ratio (cm)	Pinnae Number	Sori Density (no./cm²)	Stipe Length (cm)	Stipe Length Ratio
Asplenium adiantum-nigrum	10–40	3–12	3.3–3.3	10–25	15–30	3–20	0.3–0.5
Asplenium septentrionale	5–20	2–8	2.5–2.5	0–2	5–15	2–14	0.4–0.7
Asplenium dalhousieae	15–45	5–15	3–3	15–40	20–35	5–22	0.3–0.5
Asplenium incisum	10–35	3–10	3.3–3.5	15–35	20–40	3–17	0.3–0.5
Athyrium drepanopteron	30–80	10–25	3–3.2	30–80	25–50	6–32	0.2–0.4
Dryopteris serrato-dentata	25–70	8–22	3.1–3.2	40–90	30–60	6–28	0.25–0.4
Dryopteris splendens	40–90	12–30	3.3–3	50–100	30–70	10–36	0.25–0.4
Gymnocarpium dryopteris	15–40	5–12	3–3.3	10–30	10–25	6–24	0.4–0.6
Polystichum discretum	30–70	10–22	3–3.2	30–70	20–40	7–28	0.25–0.4
Polystichum lonchitis	15–40	4–12	3.7–3.3	20–50	15–30	3–12	0.2–0.3
Equisetum arvense	10–50	3–15	3.3–3.3	1	1	10–50	1
Equisetum ramosissimum	20–80	6–25	3.3–3.2	1	1	20–80	1
Marsilea quadrifolia	5–20	2–7	2.5–2.9	4	10–30	4–20	0.7–1.0
Adiantum capillus-veneris	15–40	5–13	3–3.1	20–60	25–50	6–24	0.4–0.6
Adiantum incisum	15–40	5–12	3–3.3	25–70	30–55	6–24	0.4–0.6
Adiantum venustum	10–25	3–8	3.3–3.1	15–40	20–40	4–15	0.4–0.6
Anogramma leptophylla	3–15	1–5	3–3	10–30	10–20	1–7	0.3–0.5
Hemionitis acrostica	10–30	3–10	3.3–3	1	80–150	3–15	0.3–0.5
Taenitis blechnoides	20–50	6–16	3.3–3.1	1	20–40	6–25	0.3–0.5
Pteris cretica	20–60	7–18	2.9–3.3	5–20	30–60	6–30	0.3–0.5
Pteris dactylina	20–50	6–15	3.3–3.3	5–15	25–50	6–25	0.3–0.5
Pteris vittata	30–90	10–28	3–3.2	20–50	40–70	9–45	0.3–0.5
Selaginella jacquemontii	5–20	2–6	2.5–3.3	1	1	5–20	1
Selaginella sanguinolenta	5–15	2–5	2.5–3	1	1	5–15	1

## Sheet: Table S3
Table S2. Morphological Characters of Studied Pteridophyte Species
Species	Habit	Habitat	Frond_Type	Division	Texture	Sori_Type	Sori_Position	Indusium	Venation	Rhizome	Stipe_Color	Repro_Structure	Spore_Type
Asplenium_adiantum_nigrum	Terrestrial	Dry rocky	Broad	Highly divided	Firm	Linear	Along veins	TRUE	Free	Short/erect	Dark	Sori	Homosporous
Asplenium_septentrionale	Lithophytic	Dry rocky	Narrow	Forked	Firm	Linear	Terminal segments	TRUE	Free	Short/erect	Dark	Sori	Homosporous
Asplenium_dalhousieae	Terrestrial	Moist forest	Narrow	Pinnate	Herbaceous	Linear	Along veins	TRUE	Free	Short/erect	Dark	Sori	Homosporous
Asplenium_incisum	Terrestrial	Moist forest	Narrow	Pinnate	Herbaceous	Linear	Along veins	TRUE	Free	Short/erect	Dark	Sori	Homosporous
Athyrium_drepanopteron	Terrestrial	Moist forest	Broad	Highly divided	Soft	Linear	Along veins	TRUE	Free	Short/erect	Light	Sori	Homosporous
Dryopteris_serrato_dentata	Terrestrial	Moist forest	Broad	Highly divided	Firm	Round	Rows	Reniform	Free	Short/erect	Brown	Sori	Homosporous
Dryopteris_splendens	Terrestrial	Moist forest	Broad	Highly divided	Firm	Round	Rows	Reniform	Free	Short/erect	Brown	Sori	Homosporous
Gymnocarpium_dryopteris	Terrestrial	Moist forest	Small	Highly divided	Soft	Round	Scattered	Absent	Free	Creeping	Green	Sori	Homosporous
Polystichum_discretum	Terrestrial	Moist forest	Narrow	Pinnate	Firm	Round	Rows	Peltate	Free	Short/erect	Brown	Sori	Homosporous
Polystichum_lonchitis	Terrestrial	Alpine	Narrow	Pinnate	Leathery	Round	Rows	Peltate	Free	Short/erect	Dark	Sori	Homosporous
Equisetum_arvense	Terrestrial	Wet soil	Reduced	None	Siliceous	Round	Strobilus	Absent	Free	Creeping	Green	Cone	Homosporous
Equisetum_ramosissimum	Terrestrial	Dry rocky	Reduced	None	Siliceous	Round	Strobilus	Absent	Free	Creeping	Green	Cone	Homosporous
Marsilea_quadrifolia	Aquatic	Wetland	Compound	4 leaflets	Herbaceous	Round	Sporocarp	Absent	Dichotomous	Creeping	Green	Sporocarp	Heterosporous
Adiantum_capillus_veneris	Lithophytic	Moist forest	Broad	Highly divided	Delicate	Marginal	Edge	FALSE	Free	Creeping	Black	Sori	Homosporous
Adiantum_incisum	Terrestrial	Moist forest	Broad	Highly divided	Delicate	Marginal	Edge	FALSE	Free	Creeping	Black	Sori	Homosporous
Adiantum_venustum	Terrestrial	Moist forest	Small	Highly divided	Delicate	Marginal	Edge	FALSE	Free	Creeping	Black	Sori	Homosporous
Anogramma_leptophylla	Terrestrial	Disturbed	Small	Highly divided	Very thin	Vein-based	Along veins	Absent	Free	Reduced	Green	Sori	Homosporous
Hemionitis_acrostica	Terrestrial	Dry rocky	Simple	Undivided	Firm	Acrostichoid	Entire lamina	Absent	Free	Short/erect	Green	Sori	Homosporous
Taenitis_blechnoides	Terrestrial	Moist forest	Simple	Undivided	Firm	Linear	Along veins	Absent	Parallel	Short/erect	Green	Sori	Homosporous
Pteris_cretica	Terrestrial	Dry rocky	Narrow	Pinnate	Herbaceous	Marginal	Edge	FALSE	Free	Short/erect	Green	Sori	Homosporous
Pteris_dactylina	Terrestrial	Dry rocky	Narrow	Digitate	Herbaceous	Marginal	Edge	FALSE	Free	Short/erect	Green	Sori	Homosporous
Pteris_vittata	Terrestrial	Dry rocky	Narrow	Pinnate	Firm	Marginal	Edge	FALSE	Free	Short/erect	Green	Sori	Homosporous
Selaginella_jacquemontii	Terrestrial	Moist forest	Microphyll	Simple	Herbaceous	Marginal	Strobilus	FALSE	Single vein	Creeping	Green	Cone	Heterosporous
Selaginella_sanguinolenta	Terrestrial	Dry rocky	Microphyll	Simple	Firm	Marginal	Strobilus	FALSE	Single vein	Creeping	Green	Cone	Heterosporous

## Sheet: Table S4
Table S4. Coded Character Matrix of Studied Pteridophyte Species
Species	Hab	Habi	FrT	Div	Tex	SP	Ind	Ven	Rh	StC	Rep	Spo
Asplenium_adiantum_nigrum	0	0	0	2	2	0	0	0	0	0	0	0
Asplenium_septentrionale	1	0	1	3	2	4	0	0	0	0	0	0
Asplenium_dalhousieae	0	1	1	1	1	0	0	0	0	0	0	0
Asplenium_incisum	0	1	1	1	1	0	0	0	0	0	0	0
Athyrium_drepanopteron	0	1	0	2	0	0	0	0	0	2	0	0
Dryopteris_serrato_dentata	0	1	0	2	2	1	1	0	0	1	0	0
Dryopteris_splendens	0	1	0	2	2	1	1	0	0	1	0	0
Gymnocarpium_dryopteris	0	1	2	2	0	3	4	0	1	2	0	0
Polystichum_discretum	0	1	1	1	2	1	2	0	0	1	0	0
Polystichum_lonchitis	0	4	1	1	2	1	2	0	0	0	0	0
Equisetum_arvense	0	2	4	4	3	6	4	0	1	2	1	0
Equisetum_ramosissimum	0	0	4	4	3	6	4	0	1	2	1	0
Marsilea_quadrifolia	2	2	5	5	1	6	4	1	1	2	2	1
Adiantum_capillus_veneris	1	1	0	2	0	1	3	0	1	0	0	0
Adiantum_incisum	0	1	0	2	0	1	3	0	1	0	0	0
Adiantum_venustum	0	1	2	2	0	1	3	0	1	0	0	0
Anogramma_leptophylla	0	3	2	2	0	0	4	0	2	2	0	0
Hemionitis_acrostica	0	0	3	0	2	5	4	0	0	2	0	0
Taenitis_blechnoides	0	1	3	0	2	0	4	2	0	2	0	0
Pteris_cretica	0	0	1	1	1	1	3	0	0	2	0	0
Pteris_dactylina	0	0	1	3	1	1	3	0	0	2	0	0
Pteris_vittata	0	0	1	1	2	1	3	0	0	2	0	0
Selaginella_jacquemontii	0	1	6	0	1	6	3	3	1	2	1	1
Selaginella_sanguinolenta	0	0	6	0	2	6	3	3	1	2	1	1
Coding Key
Habit
0 = Terrestrial, 1 = Lithophytic, 2 = Aquatic
Habitat
0 = Dry rocky, 1 = Moist forest, 2 = Wetland/wet soil, 3 = Disturbed, 4 = Alpine
Frond Type
0 = Broad, 1 = Narrow, 2 = Small, 3 = Simple, 4 = Reduced, 5 = Compound, 6 = Microphyll
Frond Division
0 = Simple, 1 = Pinnate, 2 = Highly divided, 3 = Forked/digitate, 4 = None, 5 = 4 leaflets
Sori Type
0 = Linear, 1 = Round, 2 = Marginal, 3 = Acrostichoid, 4 = Vein-based
Sori Position
0 = Along veins, 1 = Edge to Rows, 3 = Scattered, 4 = Terminal, 5 = Entire lamina, 6 = Strobilus to, Sporocarp
Indusium
0 = True, 1 = Reniform, 2 = Peltate, 3 = False, 4 = Absent
Venation
0 = Free, 1 = Dichotomous, 2 = Parallel, 3 = Single vein
Rhizome
0 = Short/erect, 1 = Creeping, 2 = Reduced
Stipe Color
0 = Dark/black, 1 = Brown, 2 = Green/light
Reproductive Structure
0 = Sori, 1 = Cone, 2 = Sporocarp
Spore Type
0 = Homosporous, 1 = Heterosporous

## Sheet: Table S5
Table S5. Anatomical Characters of Studied Pteridophyte Species
Comparative graph between length and width of Ground tissue of petiole and stems for fern species					Comparative graph between length and width of Vascular bundles of petiole for species.
Species	Cortex length (µm)	Width (µm)	Cortex length (µm)	Width (µm)
Asplenium adiantum-nigrum	1.6	1.5	2.1	2.4	Metaxylem length (µm)	Metaxylem width (µm)	Protoxylem length (µm)	Protoxylem width (µm)	Metaxylem length (µm)	Metaxylem width (µm)	Protoxylem length (µm)	Protoxylem width (µm)
Asplenium septentrionale	2.3	2	2.6	1.8	1.2	1.1	0.7	0.8	1.25	1.05	0.7	0.75
Asplenium dalhousieae	2.1	1.5	2.2	1.7	1.1	1	0.6	0.7	1.2	1	0.65	0.7
Asplenium incisum	2.5	2.2	1.6	1.7	1.3	1.2	0.7	0.8	1.3	1.1	0.75	0.8
Athyrium drepanopteron	2.3	2.2	2.3	2.1	1.2	1.1	0.7	0.8	1.25	1.05	0.7	0.75
Dryopteris serrato-dentata	1.6	2.3	2	1.8	1.4	1.2	0.8	0.9	1.35	1.15	0.8	0.85
Dryopteris splendens	2.7	2.4	3	2.8	1.4	1.1	0.7	0.8	1.4	1.1	0.75	0.8
Gymnocarpium dryopteris	1.7	2	2.4	2	1.5	1.2	0.8	0.9	1.5	1.2	0.85	0.9
Polystichum discretum	2.3	2.4	2.7	1.7	1.3	1.1	0.7	0.8	1.3	1.1	0.75	0.8
Polystichum lonchitis	2.4	2.3	2.5	2.2	1.4	1.2	0.8	0.9	1.4	1.15	0.8	0.85
Equisetum arvense	1.2	1.4	1.4	1.6	1.4	1.2	0.8	0.9	1.45	1.2	0.85	0.9
Equisetum ramosissimum	1.3	1.5	1.5	1.7	0.9	0.8	0.5	0.6	1	0.9	0.55	0.6
Marsilea quadrifolia	1.4	1.6	1.6	1.8	1	0.9	0.6	0.7	1.05	0.95	0.6	0.65
Adiantum capillus-veneris	2.2	2.1	2.3	2.2	1.1	1	0.6	0.7	1.1	1	0.65	0.7
Adiantum incisum	2.3	2.2	2.4	2.1	0.8	1.3	1.1	1	1.3	1.05	0.85	0.75
Adiantum venustum	2.1	2	2.2	2	1.2	1.1	0.7	0.8	1.25	1.05	0.75	0.8
Anogramma leptophylla	1.5	1.7	1.7	1.8	1.2	1.1	0.7	0.8	1.25	1.05	0.75	0.8
Hemionitis acrostica	1.8	2	2	2.1	1.1	1	0.6	0.7	1.15	1	0.65	0.7
Taenitis blechnoides	2.2	2.3	2.5	2.3	1.2	1.1	0.7	0.8	1.2	1.05	0.7	0.75
Pteris cretica	2.4	2.2	2.6	2.2	1.3	1.2	0.8	0.9	1.35	1.15	0.8	0.85
Pteris dactylina	2.3	2.1	2.4	2.1	1.4	1.2	0.8	0.9	1.4	1.15	0.85	0.9
Pteris vittata	2.2	2	2.3	2	1.3	1.1	0.7	0.8	1.35	1.1	0.8	0.85
Selaginella jacquemontii	1.3	1.4	1.3	1.5	1.6	1.35	0.95	1.2	1.55	1.15	1.3	1.1
Selaginella sanguinolenta	1.2	1.3	1.2	1.4	0.8	0.7	0.4	0.5	0.85	0.75	0.45	0.5
					0.7	0.6	0.4	0.5	0.8	0.7	0.4	0.45
